# Supplementary material
Source: Research Square preprint supplement (doi:10.21203/rs.3.rs-9954041/v1)

**Supplementary material**


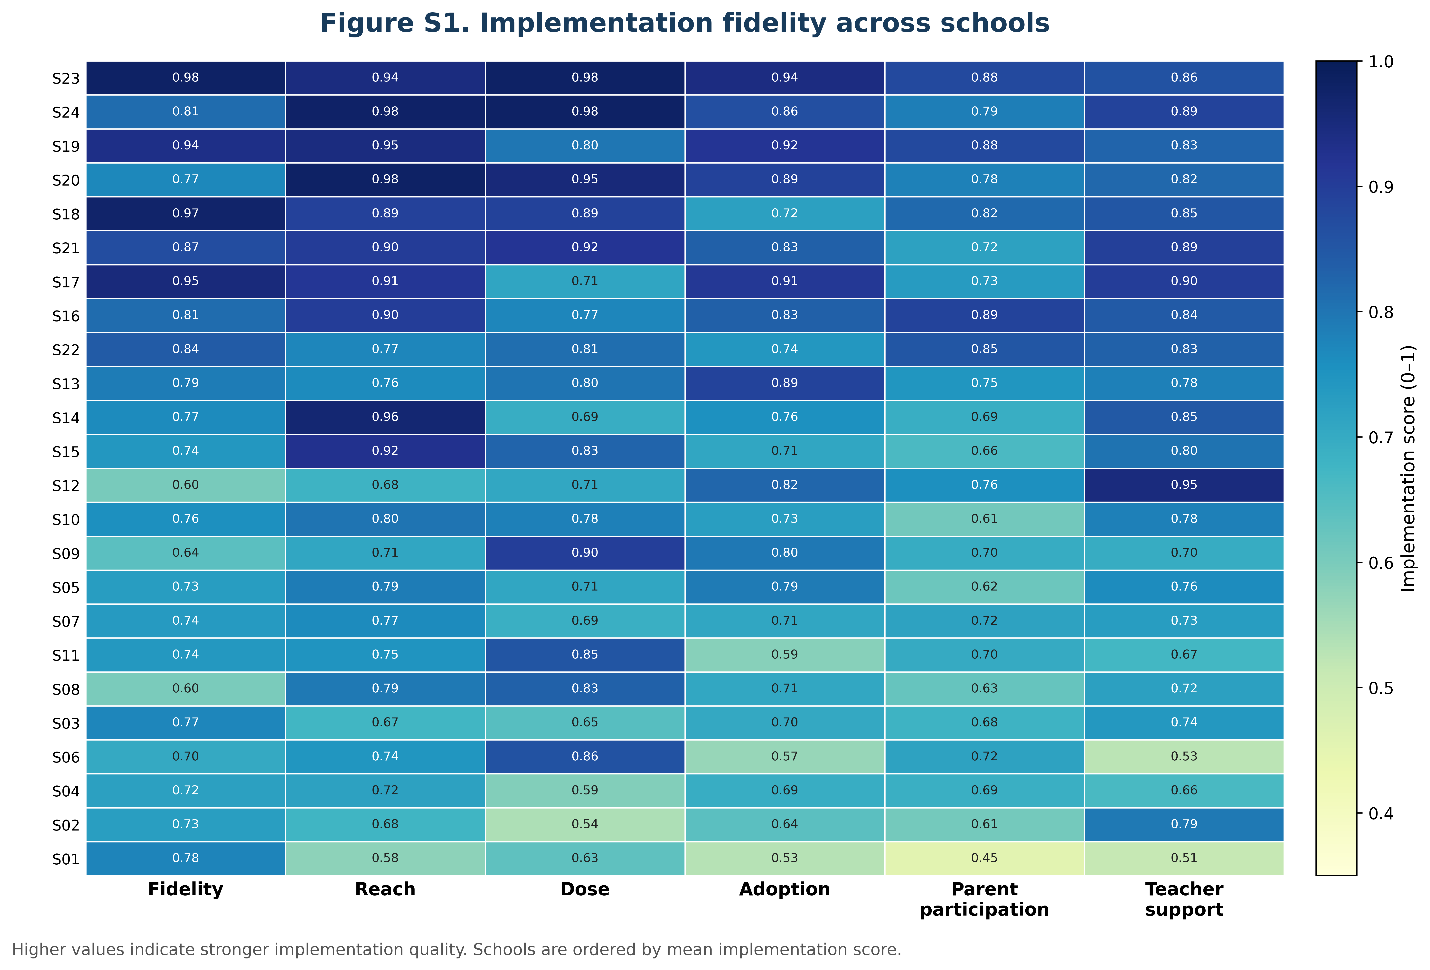


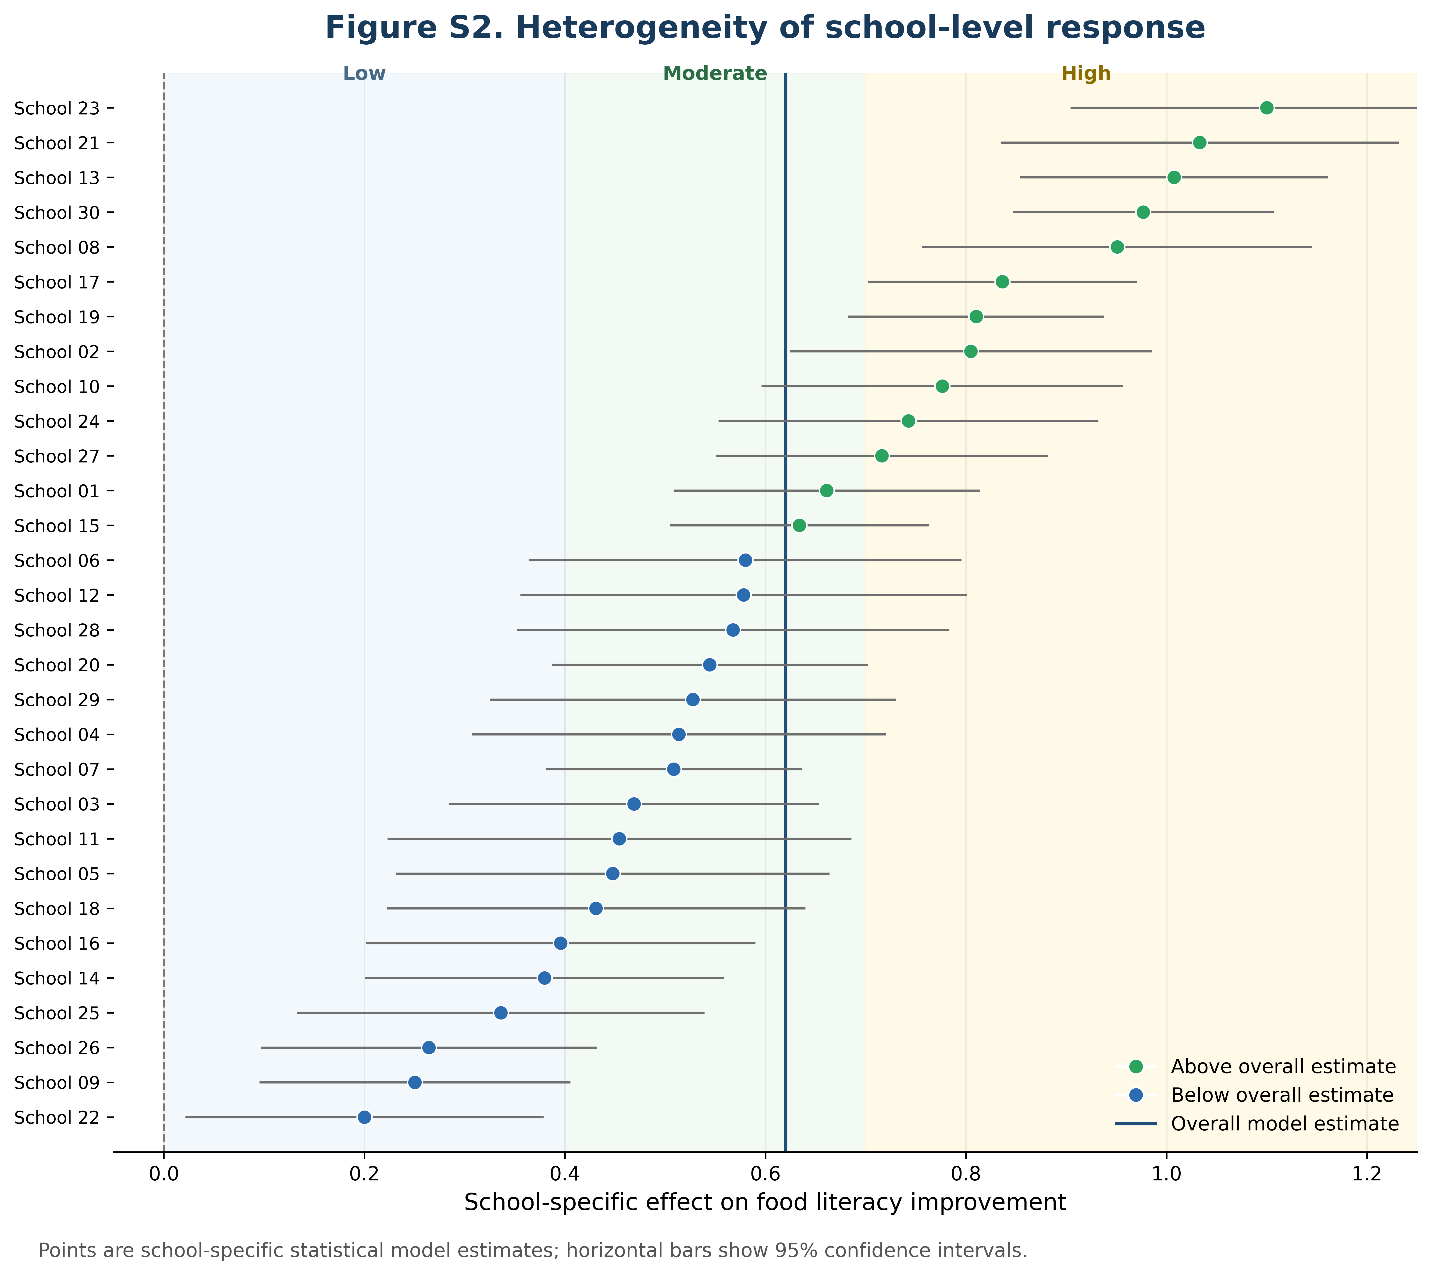


**Note:** School identifiers are anonymized analytical units generated for visualization purposes and do not correspond to the actual number of participating schools.


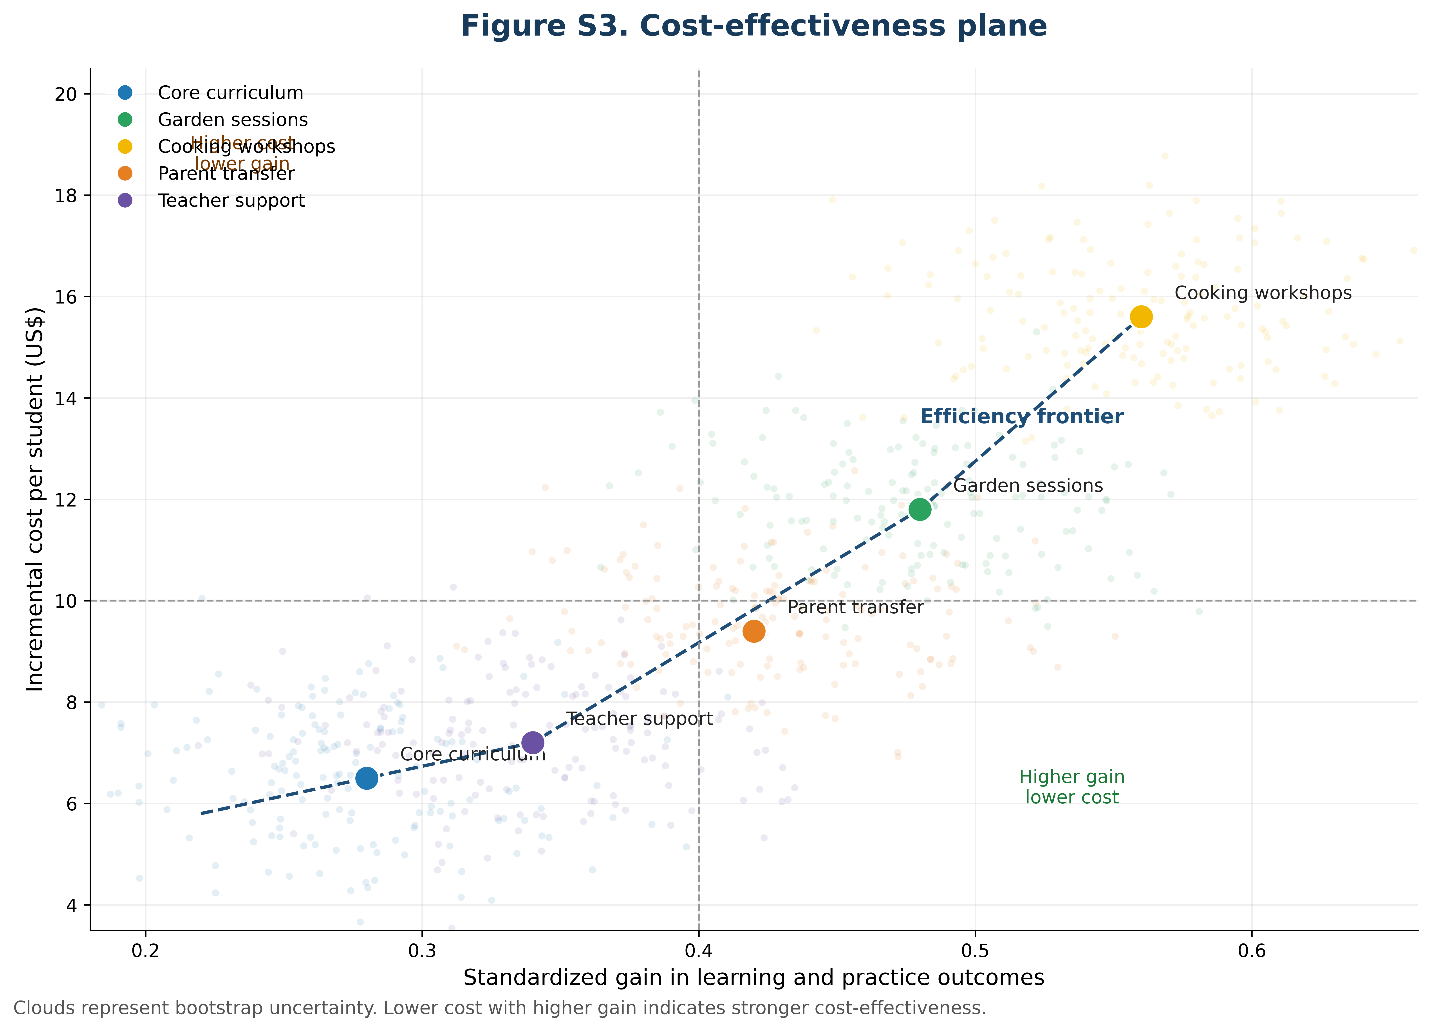


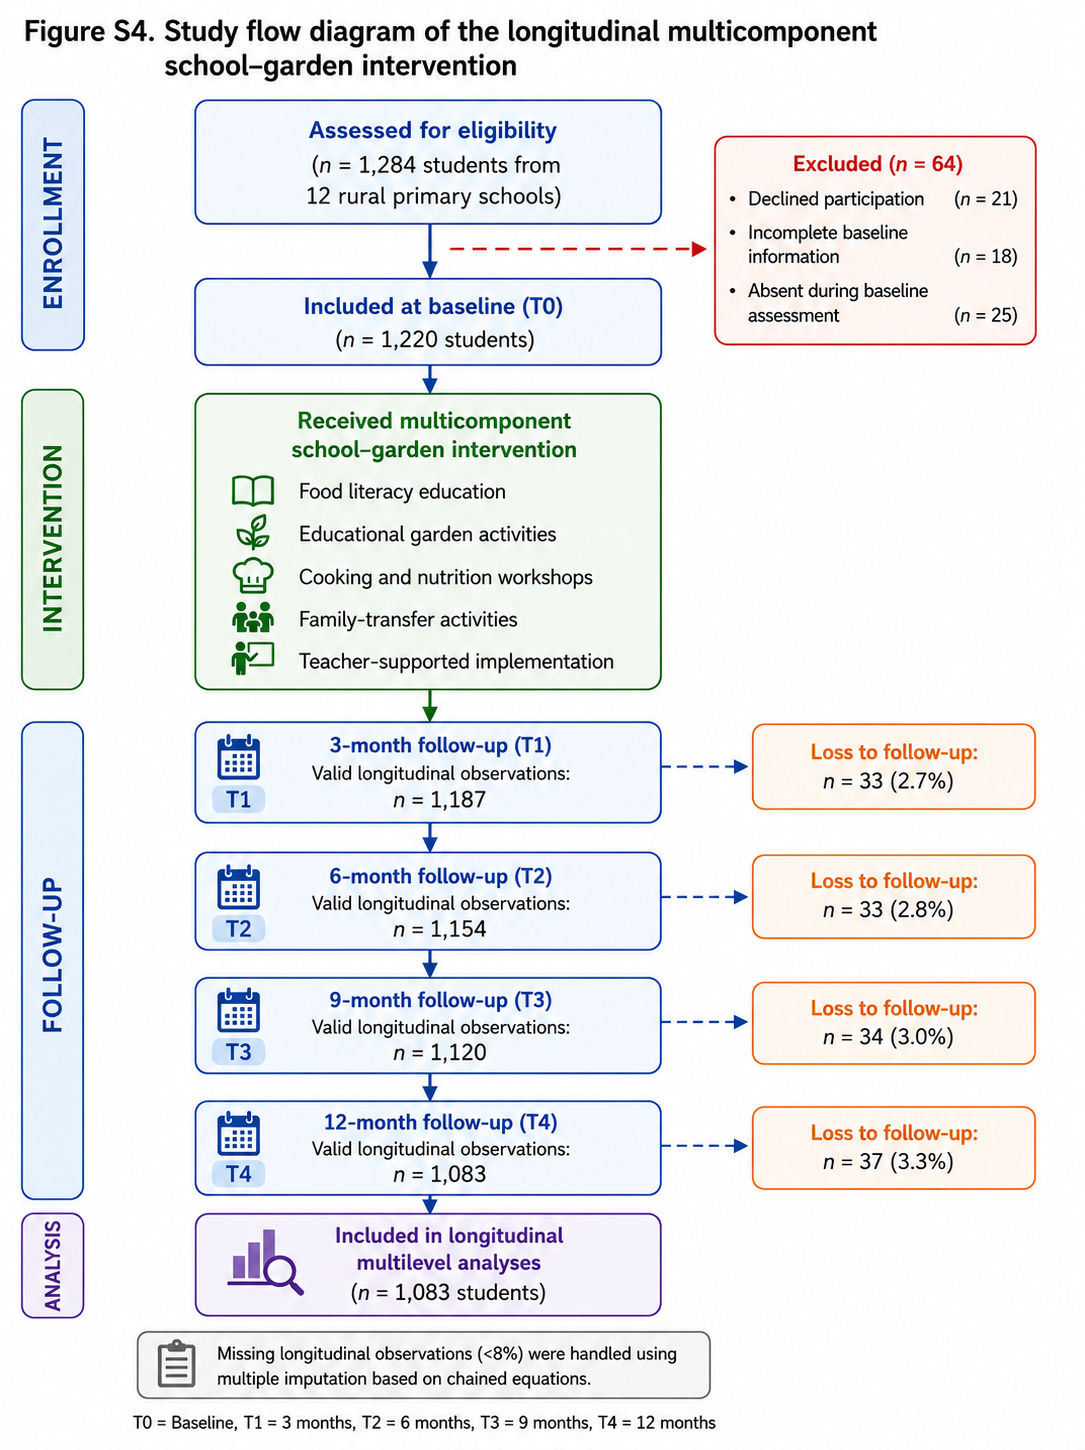

Supplement: Supplementary file 1 [file fca31fe9c59fb5e5274bdd15.docx]
